# Supplementary material for: Interaction of Perfumes with Cytochrome P-450 19
Source: MDPI journal article supplement (doi:10.3390/cosmetics11020033), 2024-02-23
Supplement: s1 [file s1]

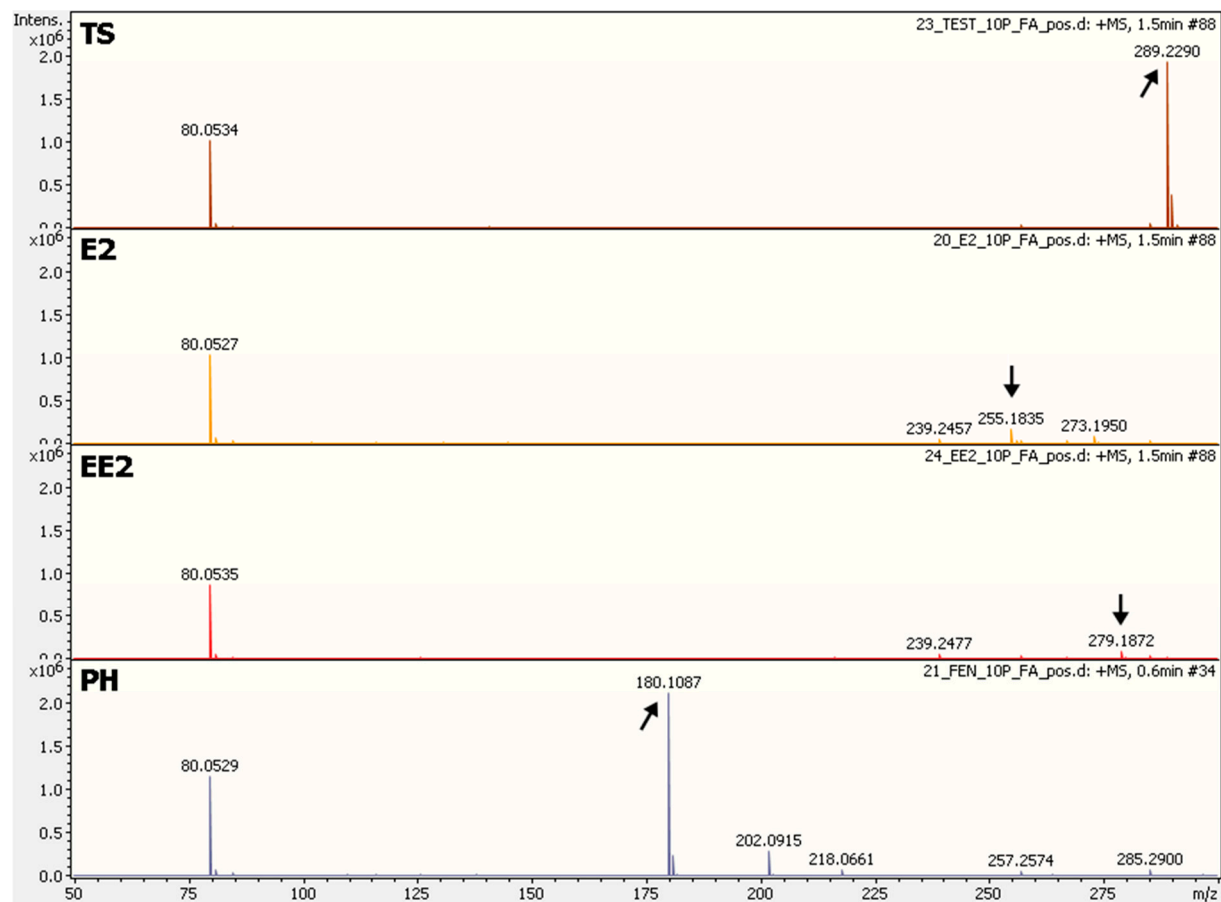

**Figure S1.** ESI ionization yield of the standards and their CID-fragmentation. ESI-qTOF MS1 spectra of a 10  $\mu$ M solution of testosterone (TS), 17 $\beta$ -estradiol (E2), 17 $\alpha$ -ethinylestradiol (EE2) and phenacetin (PH) in methanol with 0.1 % formic acid; in a uniform scale. Arrows indicate peaks characteristic of TS ( $m/z$  289.23,  $MH^+$ ), E2 ( $m/z$  255.18,  $MH^+-H_2O$ ), EE2 ( $m/z$  279.18,  $MH^+-H_2O$ ) and PH ( $m/z$  180.11,  $MH^+$ ). ESI source parameters: direct injection at 200  $\mu$ l/h, capillary voltage 4500 V, nebulizer 0.4 bar, dry gas 4 l/min, dry temperature 180  $^{\circ}$ C.

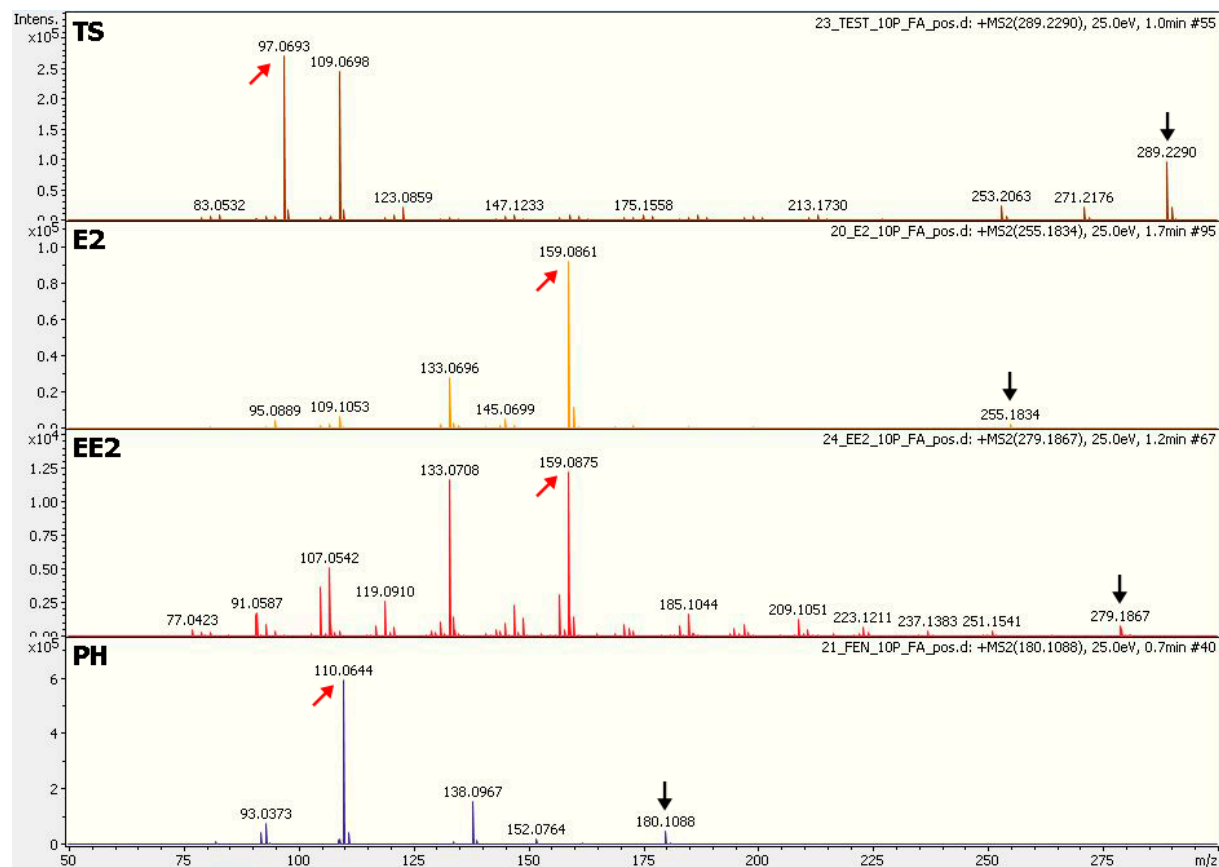

**Figure S2.** CID fragmentation of the standards. ESI-qTOF MS2 spectra of a 10  $\mu$ M solution of testosterone (TS), 17 $\beta$ -estradiol (E2), 17 $\alpha$ -ethinylestradiol (EE2) and phenacetin (PH) in methanol with 0.1 % formic acid. Black arrows indicate precursor peaks, red arrows indicate most intensive fragment peak used for confirmation. ESI source parameters: direct injection at 200  $\mu$ l/h, capillary voltage 4500 V, nebulizer 0.4 bar, dry gas 4 l/min, dry temperature 180  $^{\circ}$ C, collision energy 25 eV

**Scheme S1:** Methodological steps of the study with the composition of the samples used in each method of analysis and a summary of the main findings.

| Analytical Approach No. | Purpose                                                                                                                           | Assay          | Enzymes Present | Tested Perfumes                                     | Internal Standard | Separation / Product Detection       | Results                                                                                                                      |
|-------------------------|-----------------------------------------------------------------------------------------------------------------------------------|----------------|-----------------|-----------------------------------------------------|-------------------|--------------------------------------|------------------------------------------------------------------------------------------------------------------------------|
| 1                       | A pilot experiment                                                                                                                | CYP19 activity | CYP19, CYPOR    | Samples 1-10                                        | -                 | TLC / H <sub>2</sub> SO <sub>4</sub> | CYP19 activity assay developed.                                                                                              |
| 2                       | Determination of perfume components impact on the chromatographic column; estimation of CYP19 activity inhibition by the Samples. |                |                 |                                                     | Phenacetin        | HPLC / UV-VIS                        | No deterioration of the chromatographic column observed for any of the Samples; inhibitory effect estimated for Samples 1-3. |
| 3                       | Quantification of CYP19 activity inhibition by the Samples.                                                                       |                |                 |                                                     | Phenacetin, EE2   | HPLC / MS                            | Inhibitory effect quantified for all Samples.                                                                                |
| 4                       | Comparison of CYP19 activity inhibition by the UV exposed and unaffected Samples.                                                 |                |                 | Samples 3 (h.i.e.) and 6 (l.i.e.) after UV exposure | Phenacetin, EE2   | HPLC / MS                            | Inhibitory effect of the Sample 6 (l.i.e.) enhanced after UV irradiation, while was unaffected for Sample 3 (h.i.e.).        |
| 5                       | Determination whether CYP19 or CYPOR is affected by the Sample components.                                                        | CYPOR activity | CYPOR           | Sample 3 (h.i.e.)                                   | -                 | - / UV-VIS                           | CYP19 was the enzyme affected by the Sample.                                                                                 |

**Abbreviations:** CYP19 - aromatase; CYPOR - NADPH:cytochrome P450 oxidoreductase ; TLC - Thin Layer Chromatography; HPLC - High-Performance Liquid Chromatography; UV-VIS - ultraviolet-visible spectroscopy; MS - Mass Spectrometry; EE2 - 17 $\alpha$ -ethinylestradiol ; h.i.e. - highest inhibitory effect; l.i.e. - lowest inhibitory effect.

## **Methods S1.** qTOF MS Acquisition Method Parameters

- Ion Polarity: Positive
- Mass Range: 50 to 1300 m/z
- Spectra Rate: 4 Hz

### 1/ Mode

- Save Spectra: Line and Profile Spectra
- Absolute Threshold: 25 cts.
- Peak Summation Width: 3 pts.

### 2/ Source

- End Plate Offset: 500 V
- Capillary: 4500 V
- Nebulizer: 1.8 Bar
- Dry Gas: 8.0 l/min
- Dry Temp: 220 °C

### 3/ Tune

- Transfer
  - Funnel 1 RF: 150.0 Vpp
  - isCID Energy: 0.0 eV
  - Multipole RF: 50.0 Vpp
- Quadrupole
  - Ion Energy: 4.0 eV
  - Low Mass: 60.0 m/z
- Collision Cell

- Collision Energy: 7.0 eV
- Collision RF: 300 Vpp
- Transfer Time: 80.0 μs
- Pre Pulse Storage: 5.0 μs

#### 4/ MS/MS

##### Auto MS/MS

- No. of Precursors: 3
- Absolute Threshold: 400 cts.
- Active Exclusion
  - Exclude after: 3 Spectra
  - Release after: 0.30 min
  - Reconsider Precursor, if Current Intens. / Previous Intens.: 5.0
- Smart Exclusion: 2×
- Precursor Ion List: Include
  - Mass Range:
    - 180.06-180.16
    - 255.13-255.23
    - 279.14-279.24
    - 289.18-289.28

##### Preferences

- no preferences

##### CID

- Isolation + Fragmentation List

| Type | Mass     | Width | Collision | Charge State |
|------|----------|-------|-----------|--------------|
| Base | 500.0000 | 5.00  | 25.00     | 1            |

##### Acquisition

- MS/MS
  - Low: 10000 cts, 8 Hz
  - High: 100000 cts, 8 Hz
